# Supplementary material
Source: publisher figshare collection journal article supplement (https://tandf.figshare.com/ndownloader/files/15129176)
Supplement: Supplementary file 1 [file 15129176]

# New $\alpha$ -Ditetralonyl Glucoside from The Green Walnut Husk of *Juglans mandshurica*

An-dong Wang<sup>a,c,1</sup>, Xin-yu Xie<sup>b,c,1</sup>, Wei-ming Zeng<sup>b,c</sup>, Jian-yu Liu<sup>b,c,\*</sup>, Yong-nan Xu<sup>b,c,\*</sup>

<sup>a</sup> School of Traditional Chinese Medicine, Shenyang Pharmaceutical University, Shenyang 110016, China; E-Mail: wangandong19891220@163.com (A.-D.W.)

<sup>b</sup> School of Pharmaceutical Engineering, Shenyang Pharmaceutical University, Shenyang 110016, China

<sup>c</sup> Key Laboratory of Structure-Based Drug Design & Discovery, Ministry of Education, Shenyang Pharmaceutical University, Shenyang 110016, China

\* Corresponding author

E-Mail: burningice@126.com (J.-Y.Liu); [ynxu@syphu.edu.cn](mailto:ynxu@syphu.edu.cn) (Y.-N. Xu).

<sup>1</sup> These authors contributed equally to this work and shared first authorship.

## Abstract

One new  $\alpha$ -ditetralonyl glucoside (**1**), was isolated from the green walnut husk of *Juglans mandshurica* (Juglandaceae), together with twelve known compounds (**2-13**). The structure of the new compound was determined as (2*R*,4*S*,10*S*,12*S*)-2-[7-(12,13,16-trihydroxy- $\alpha$ -tetralonyl-13-*O*- $\beta$ -D-glucopyranoside)]-4,8-dihydroxy- $\alpha$ -tetralone-4-*O*- $\beta$ -D-glucopyranoside (**1**), on the basis of detailed spectroscopic analyses, and acidic hydrolysis. Compounds **6**, **7** and **11** were isolated from the genus *Juglans* for the first time. Compound **1-13** showed weak cytotoxic against A549 and HeLa cell lines.

## Keyword

*Juglans mandshurica*, Juglandaceae,  $\alpha$ -ditetralonyl glucoside, cytotoxic activity

**Figure S1.** HR ESI-TOF MS spectrum of compound **1**

**Figure S2.** CD spectrum of compound **1**

**Figure S3.** The  $^1\text{H}$  NMR (Methanol- $d_4$ , 600 MHz) spectrum of compound **1**

**Figure S4.** The  $^{13}\text{C}$  NMR (Methanol- $d_4$ , 100 MHz) spectrum of compound **1**

**Figure S5.** HSQC spectrum of compound **1**

**Figure S6.** HMBC spectrum of compound **1**

**Figure S7.** NOESY spectrum of compound **1**

**Figure S8.**  $^1\text{H}$ - $^1\text{H}$  COSY spectrum of compound **1**

**Figure S9** The key  $^1\text{H}$ - $^1\text{H}$  COSY, HMBC and NOESY correlations of compound **1**

**Figure S10** Cytotoxic activities of compounds against two human cancer cell lines

**Table S1** Cytotoxicity data of isolated compounds **1-13**

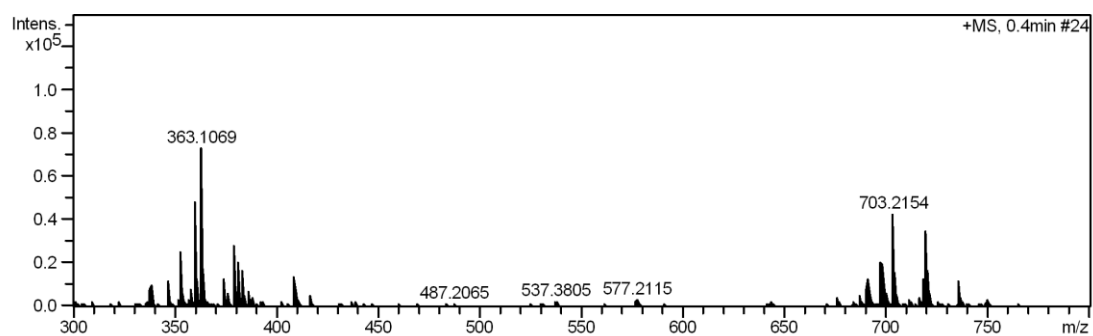

**Figure S1.** HR-ESI-TOF MS spectrum of compound **1**

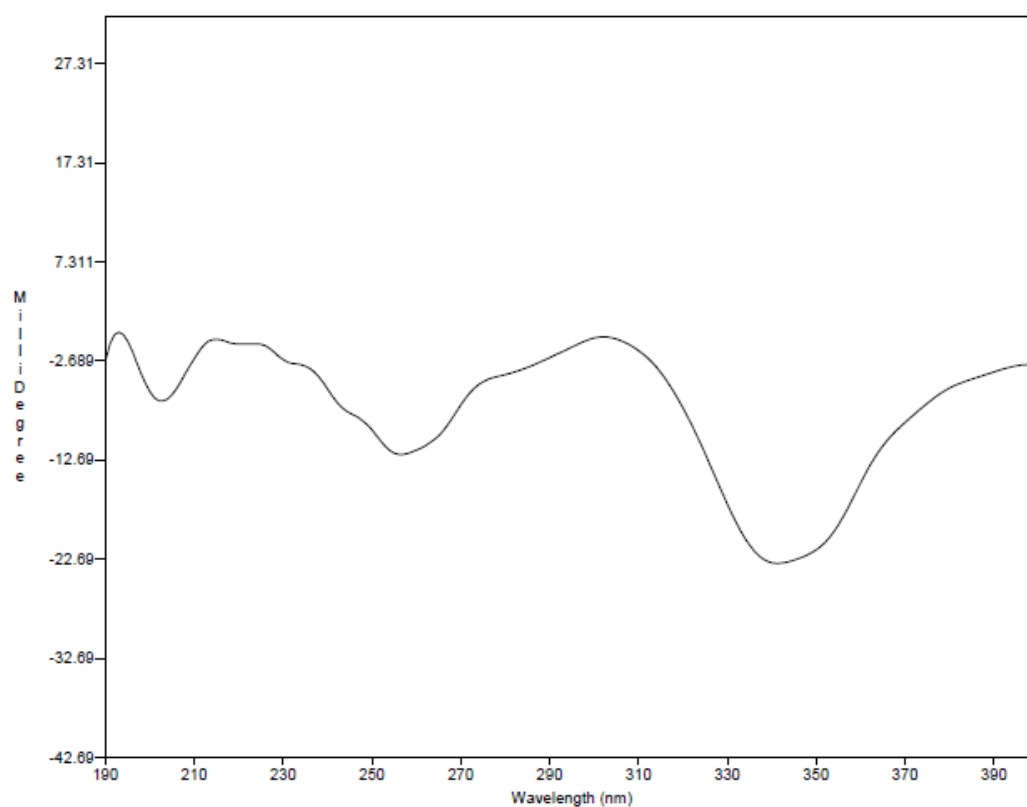

**Figure S2.** CD spectrum of compound **1**

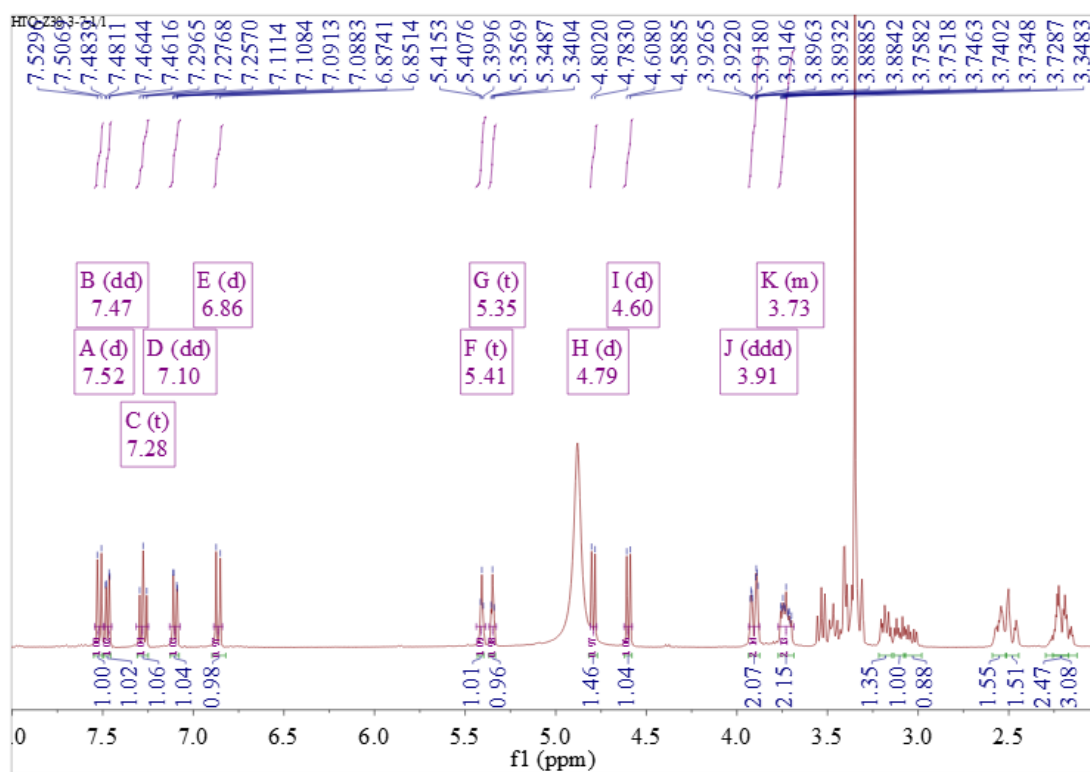

**Figure S3.** The <sup>1</sup>H NMR (Methanol-*d*<sub>4</sub>, 600 MHz) spectrum of compound **1**

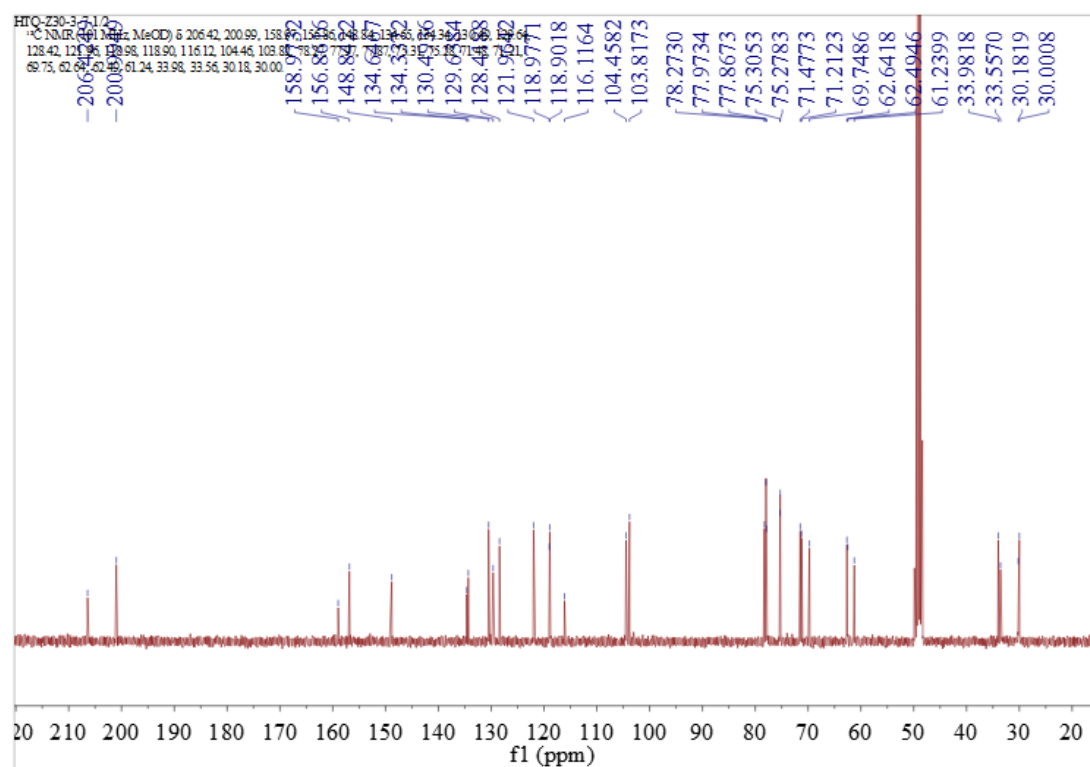

**Figure S4.** The <sup>13</sup>C NMR (Methanol-*d*<sub>4</sub>, 100 MHz) spectrum of compound **1**

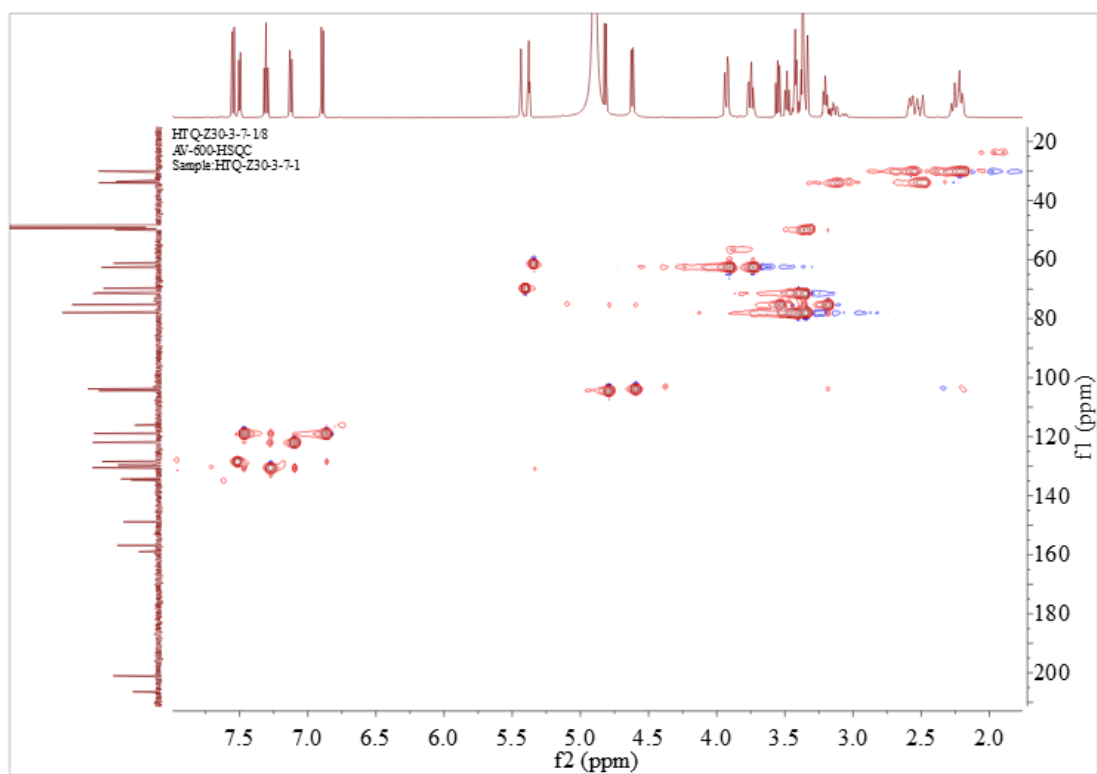

**Figure S5.** HSQC spectrum of compound **1**

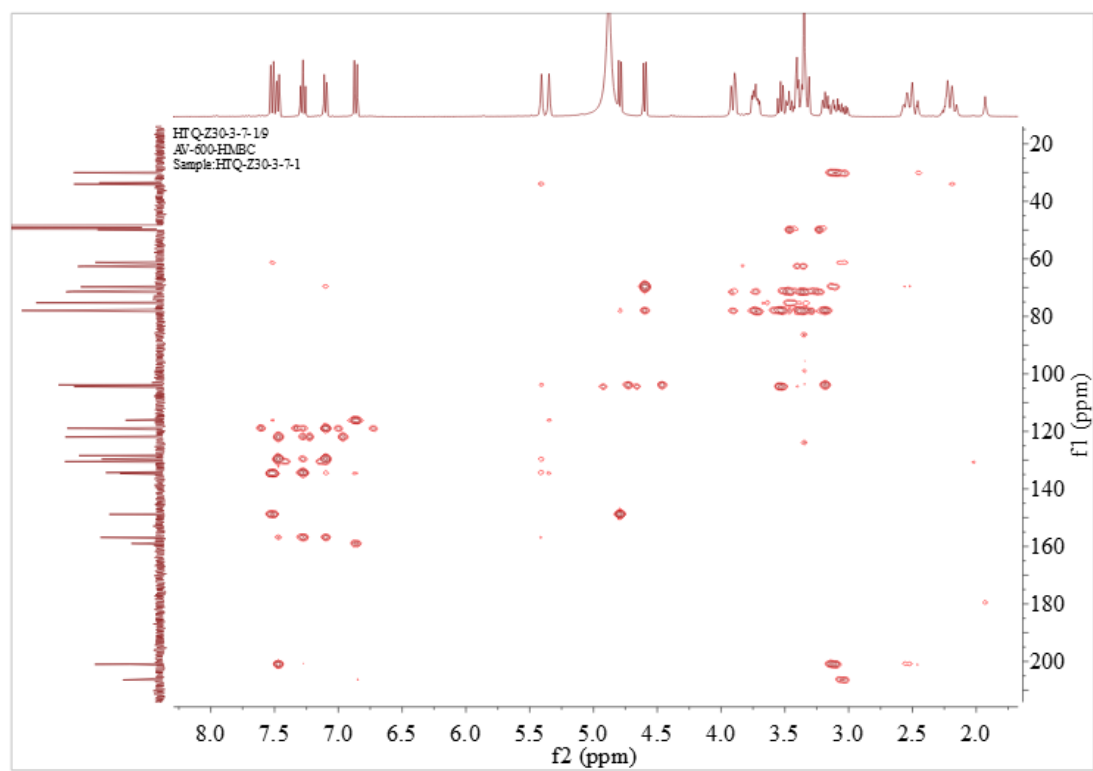

**Figure S6.** HMBC spectrum of compound **1**

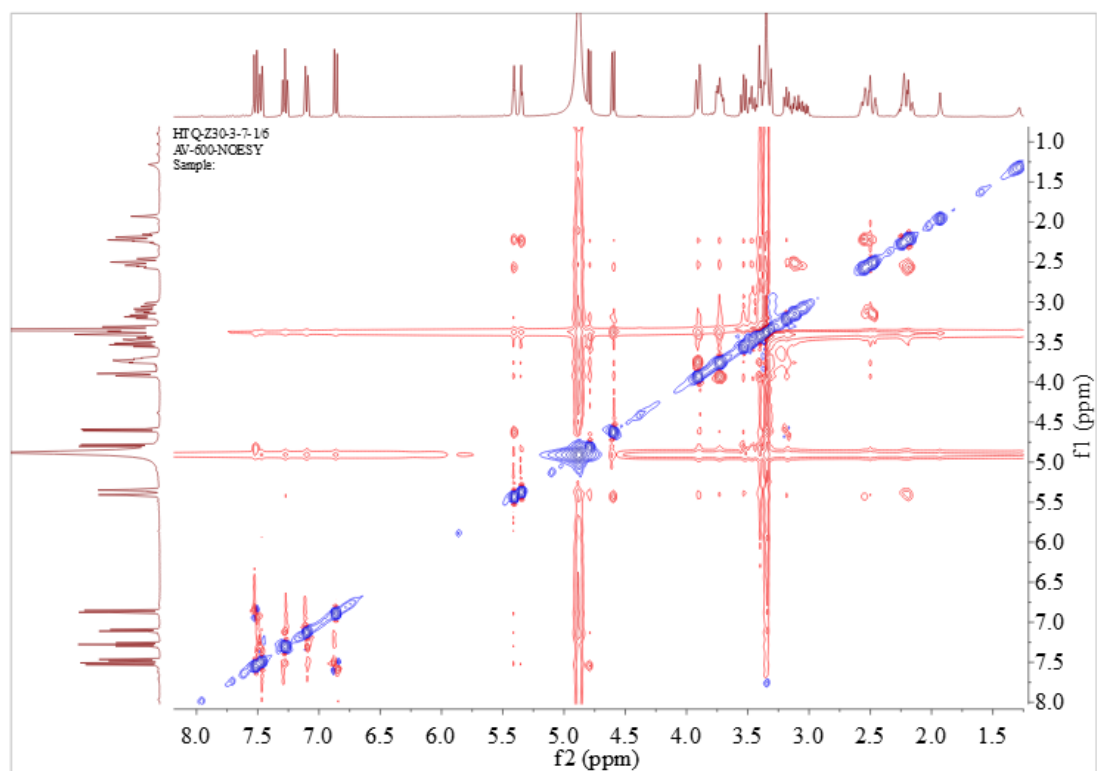

**Figure S7.** NOESY spectrum of compound **1**

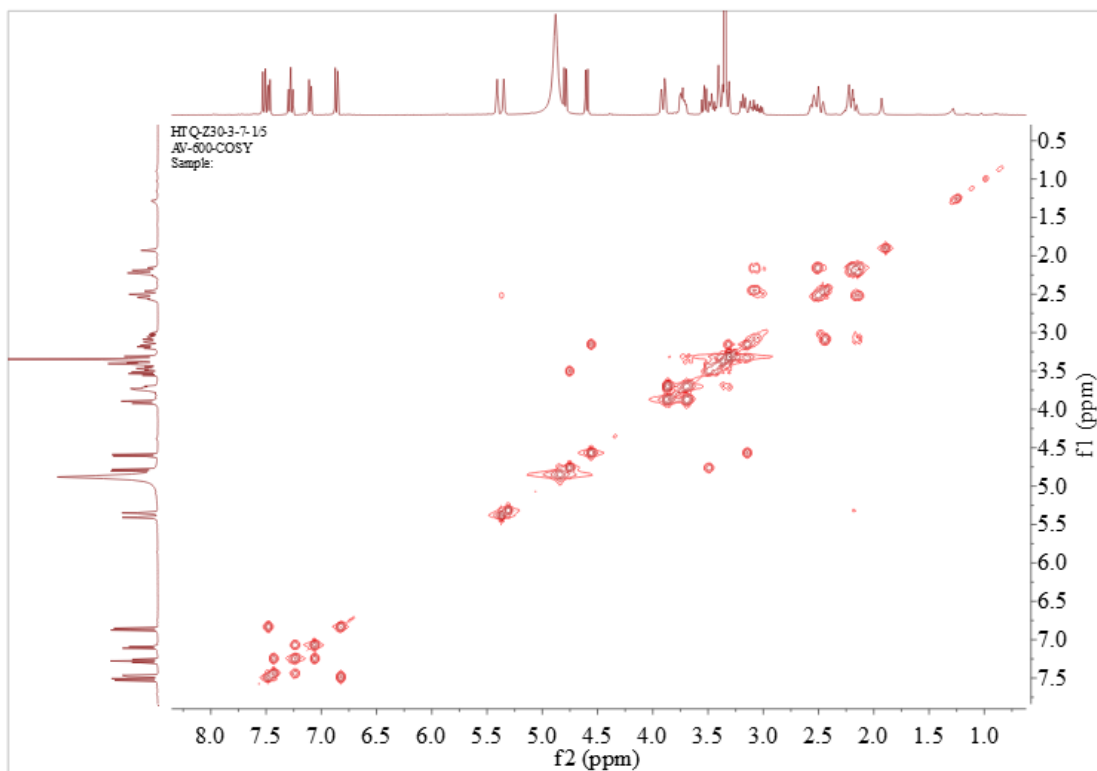

**Figure S8.** <sup>1</sup>H-<sup>1</sup>H COSY spectrum of compound **1**

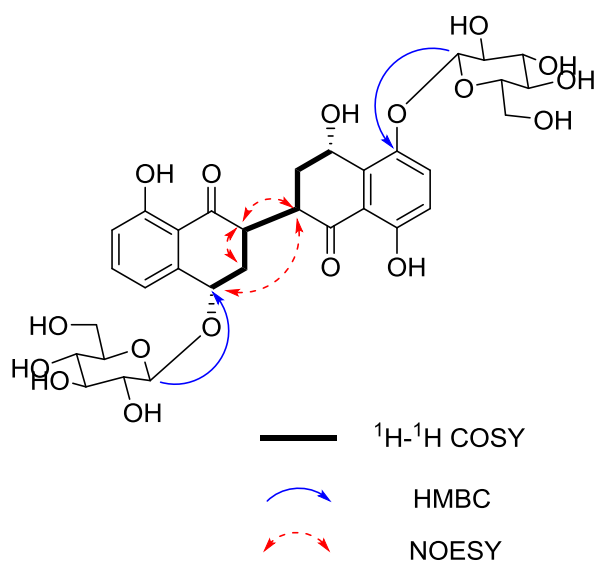

**Figure S9** the key  $^1\text{H}$ - $^1\text{H}$  COSY, HMBC and NOESY correlations of compound **1**

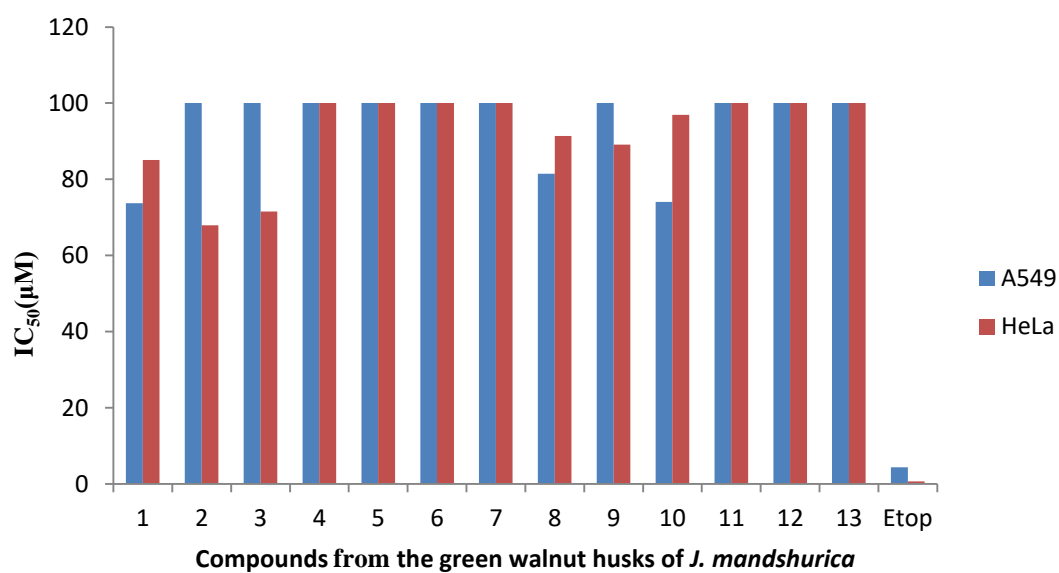

**Figure S10** Cytotoxic activities of compounds against two human cancer cell lines

**Table S1** Cytotoxicity data of isolated compounds **1-13**.<sup>a</sup>

| Compound               | IC <sub>50</sub> (μM) |      | Compound  | IC <sub>50</sub> (μM) |      |
|------------------------|-----------------------|------|-----------|-----------------------|------|
|                        | A549                  | HeLa |           | A549                  | HeLa |
| <b>1</b>               | 73.7                  | 85.1 | <b>8</b>  | 81.5                  | 91.4 |
| <b>2</b>               | >100                  | 67.9 | <b>9</b>  | >100                  | 89.1 |
| <b>3</b>               | >100                  | 71.5 | <b>10</b> | 74.1                  | 96.9 |
| <b>4</b>               | >100                  | >100 | <b>11</b> | >100                  | >100 |
| <b>5</b>               | >100                  | >100 | <b>12</b> | >100                  | >100 |
| <b>6</b>               | >100                  | >100 | <b>13</b> | >100                  | >100 |
| <b>7</b>               | >100                  | >100 |           |                       |      |
| Etoposide <sup>b</sup> | 4.4                   | 0.7  |           |                       |      |

A549: human lung cancer cell lines

HeLa: human cervical carcinoma cancer cell lines

<sup>a</sup> Data expressed as IC<sub>50</sub> values (μM);

<sup>b</sup> Positive control.
